# Supplementary material for: Immobilization of laccase on Fe3O4@MF-CNTs for the rapid and sensitive biosensing of catechol
Source: Royal Society of Chemistry journal article supplement (doi:10.1039/d3nj00266g), 2023-01-01
Supplement: d3nj00266g2.pdf [file d3nj00266g2.pdf]

## Supporting Information

### Immobilization of laccase on Fe<sub>3</sub>O<sub>4</sub>@MF-CNTs for the rapid and sensitive biosensing of catechol

Zhaofei Liu,<sup>a</sup> Lili Zhang,<sup>a</sup> Yuhang Wei<sup>a</sup> and Zhiming Chen<sup>\*a</sup>

<sup>a</sup> School of Chemical and Environmental Engineering, Anhui Laboratory of Functional Coordinated Complexes for Materials Chemistry and Application, Anhui Polytechnic University, Wuhu 241000, China.

\* Corresponding author. E-mail: [zmchen@ahpu.edu.cn](mailto:zmchen@ahpu.edu.cn) (Z. Chen)

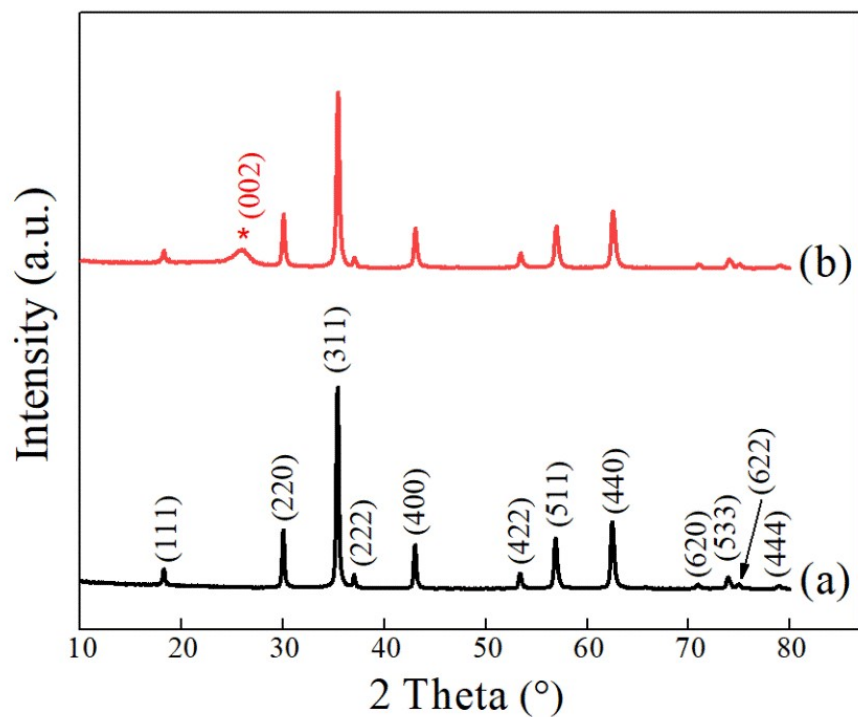

**Fig. S1.** XRD patterns of (a)  $\text{Fe}_3\text{O}_4@MF$  nanoparticles and (b)  $\text{Fe}_3\text{O}_4@MF\text{-CNTs}$  nanocomposites, the \* signalled hexagonal carbon.

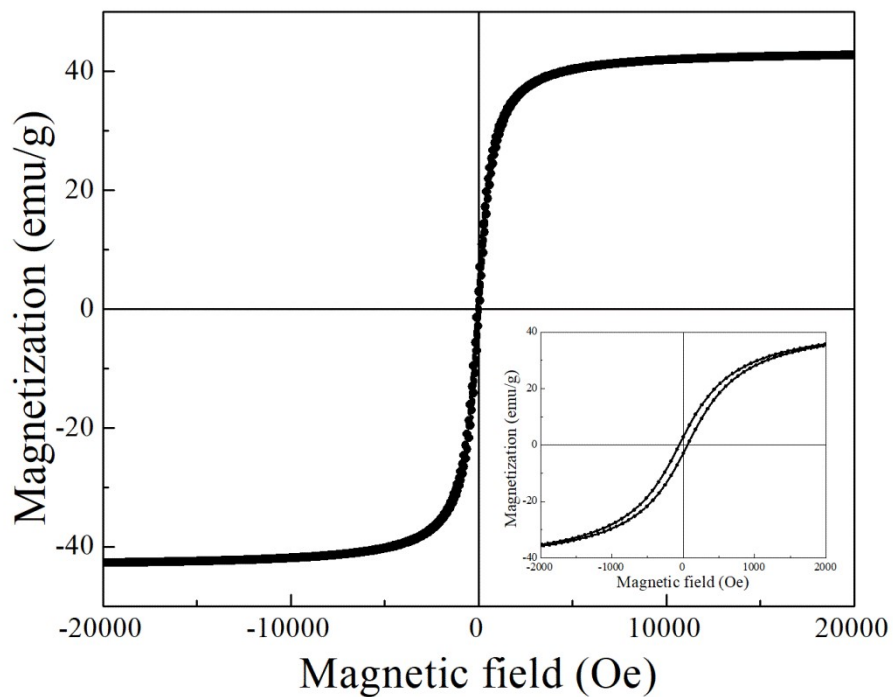

**Fig. S2.** Magnetic hysteresis loop of  $\text{Fe}_3\text{O}_4@MF\text{-CNTs}$  nanocomposites at 300 K.

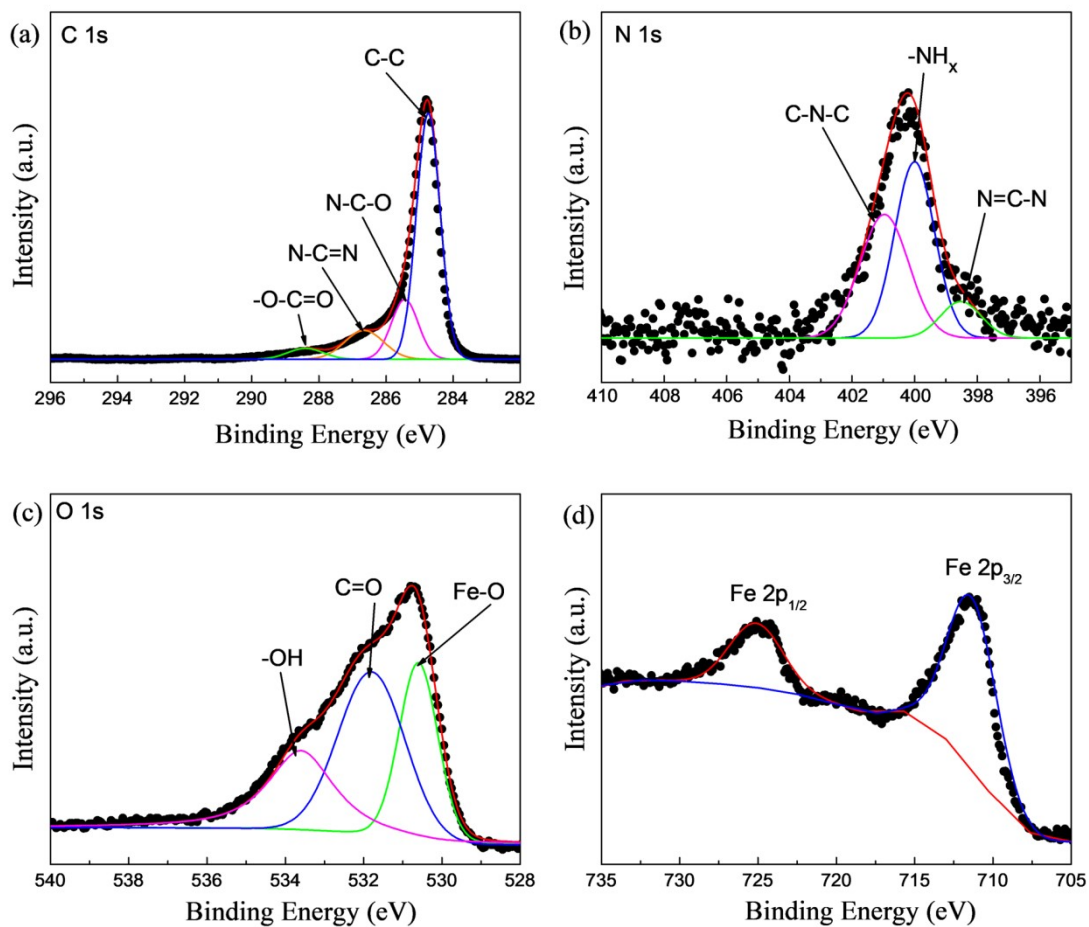

**Fig. S3.** (a) C 1s, (b) N 1s, (c) O 1s and (d) Fe 2p XPS spectra of Fe<sub>3</sub>O<sub>4</sub>@MF-CNTs nanocomposites.

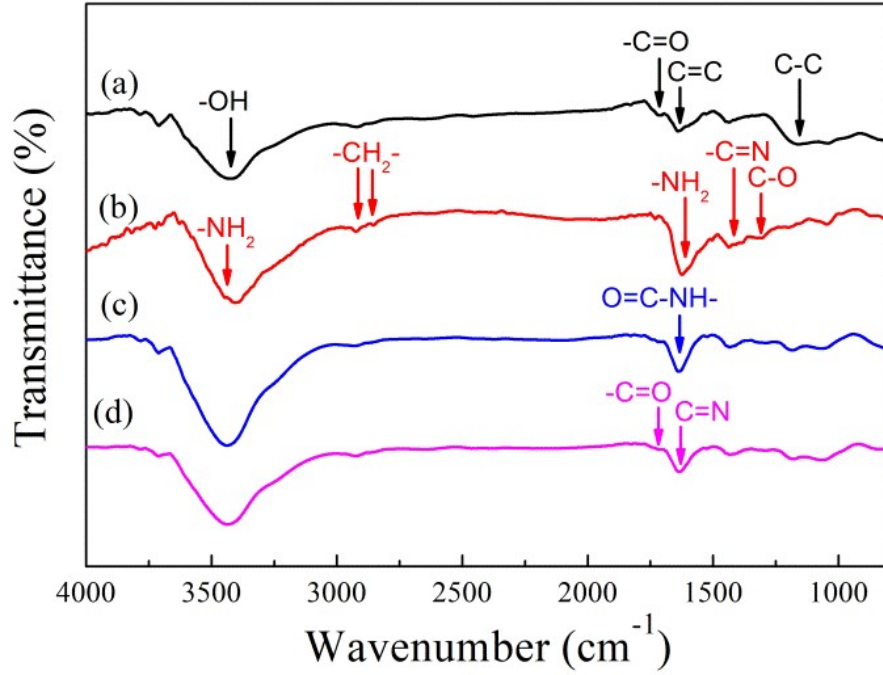

**Fig. S4.** FT-IR spectra of (a) CNTs-COOH, (b) amino-functionalized  $\text{Fe}_3\text{O}_4@MF$  nanoparticles, (c) amino-functionalized  $\text{Fe}_3\text{O}_4@MF\text{-CNTs}$  nanocomposites and (d) aldehyde-functionalized  $\text{Fe}_3\text{O}_4@MF\text{-CNTs}$  nanocomposites.

**Table S1.** Effective surface areas of bare GCE,  $\text{Fe}_3\text{O}_4@MF$  and  $\text{Fe}_3\text{O}_4@MF\text{-CNTs}$  electrodes.

| Electrode                              | Randles's slope/ $\mu\text{A}/(\text{mV}/\text{s})^{1/2}$ | Effective areas/ $\text{cm}^2$ |
|----------------------------------------|-----------------------------------------------------------|--------------------------------|
| Bare GCE                               | $19.99 \pm 0.23$                                          | $0.1755 \pm 0.0020$            |
| $\text{Fe}_3\text{O}_4@MF$             | $21.19 \pm 0.16$                                          | $0.1839 \pm 0.0014$            |
| $\text{Fe}_3\text{O}_4@MF\text{-CNTs}$ | $29.54 \pm 0.25$                                          | $0.2563 \pm 0.0022$            |

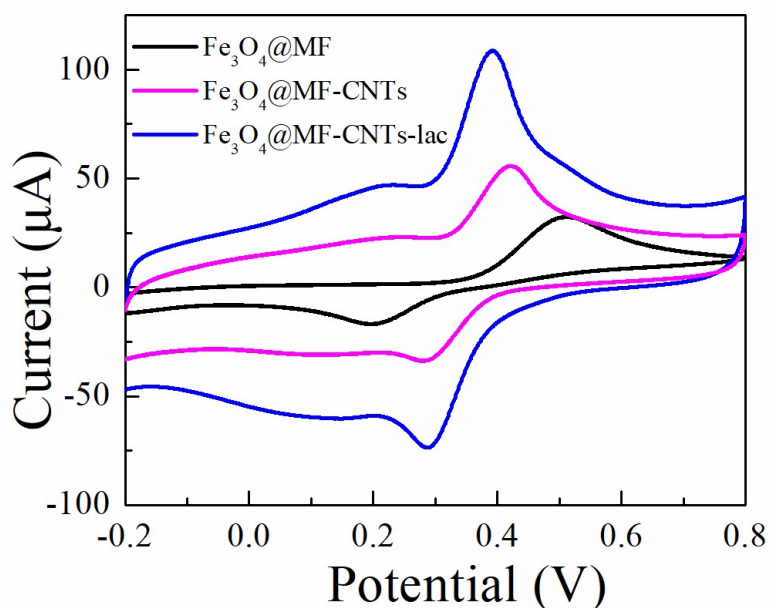

**Fig. S5.** CV curves of 800  $\mu\text{M}$  catechol at  $\text{Fe}_3\text{O}_4@MF$ ,  $\text{Fe}_3\text{O}_4@MF\text{-CNT}$  and  $\text{Fe}_3\text{O}_4@MF\text{-CNTs-Lac}$  electrodes in acetic acid buffer (pH = 4.5, 0.2 M).

**Table S2** Performance comparison of different laccase based electrodes toward catechol.

| Electrode                  | Detection limit     | linear range                         | Sensitivity                                 | reference |
|----------------------------|---------------------|--------------------------------------|---------------------------------------------|-----------|
| Lac/CNTs/CS/GC             | 0.66 $\mu\text{M}$  | 1.2-30 $\mu\text{M}$                 | n.d.                                        | 1         |
| AuNP-MoS <sub>2</sub> -Lac | 2 $\mu\text{M}$     | 2-2000 $\mu\text{M}$                 | 16.3 $\mu\text{A}/\text{mM}$                | 2         |
| SiNPs/PBSeThTh/MWCNTs/lac  | 1.11 $\mu\text{M}$  | 10-400 $\mu\text{M}$                 | n.d.                                        | 3         |
| GCE/Lac                    | n.d.                | 1.0-90.9 $\mu\text{M}$               | 0.0954 $\mu\text{A}/\mu\text{M}$            | 4         |
| Lac-Au-ZnO                 | 25 nM               | 75 nM-<br>1100 $\mu\text{M}$         | 131 $\mu\text{A}/\text{mM}$                 | 5         |
| WlacD-GC/lac               | 1.0 $\mu\text{M}$   | 0.5-300 $\mu\text{M}$                | n.d.                                        | 6         |
| Lac/Au-CTAB/GO             | 1.5 $\mu\text{M}$   | 0.1-5 and 16.7-<br>166 $\mu\text{M}$ | 37 and 16<br>$\mu\text{A}/\text{mM}$        | 7         |
| GE/BOTT/Lac                | 0.38 $\mu\text{M}$  | 0.5-25.0 $\mu\text{M}$               | 110.8 $\mu\text{A}/\text{mM}$               | 8         |
| eLac-C-SPE                 | 1.7 $\mu\text{M}$   | 2-100 $\mu\text{M}$                  | n.d.                                        | 9         |
| FYSSns-2-Lac               | 1.6 $\mu\text{M}$   | 12.5-450 $\mu\text{M}$               | n.d.                                        | 10        |
| PDA-Lac-NiCNFs/MGCE        | 0.69 $\mu\text{M}$  | 1-9100 $\mu\text{M}$                 | 25 $\mu\text{A}/\text{mM}/\text{cm}$        | 11        |
| Lac-F <sub>3</sub> N-CDs   | 0.014 $\mu\text{M}$ | 12-450 $\mu\text{M}$                 | 219.17<br>$\mu\text{A}/\text{mM}/\text{cm}$ | 12        |
| CotA lac/Sg-CN/ITO         | 0.47 $\mu\text{M}$  | 1-900 $\mu\text{M}$                  | 0.95 A/M/cm                                 | 13        |
| TiO <sub>2</sub> /NAF/Lac  | 0.75 $\mu\text{M}$  | 0.75-150 $\mu\text{M}$               | 2.94 $\mu\text{A}/\mu\text{M}$              | 14        |

|                                            |                              |                                       |                                          |           |
|--------------------------------------------|------------------------------|---------------------------------------|------------------------------------------|-----------|
| Au/PBA/Lac                                 | 0.06 $\mu\text{M}$           | 0.2-550 $\mu\text{M}$                 | n.d.                                     | 15        |
| CotA/thGP/AuNPs/GE                         | 0.3 $\mu\text{M}$            | 1.6-409.6 $\mu\text{M}$               | 0.11 $\mu\text{A}/\text{mM}$             | 16        |
| Lac/MWCNT-COOH/AuNPs-SDBS-PEDOT            | 0.11 and 12.26 $\mu\text{M}$ | 0.1-0.5 and 11.99-94.11 $\mu\text{M}$ | 12.4 and 0.0955 $\mu\text{A}/\text{mM}$  | 17        |
| BC/cMWCNTs/LAC@ZIF-90                      | 1.86 $\mu\text{M}$           | 20-400 $\mu\text{M}$                  | 22 $\mu\text{A}/\text{mM}$               | 18        |
| GE/CDs/PFTBDT/Lac                          | 1.23 $\mu\text{M}$           | 1.25-175 $\mu\text{M}$                | 737.44 $\mu\text{A}/\text{mM}/\text{cm}$ | 19        |
| Ppy-TP/Lac                                 | n.d.                         | 1-60/70 $\mu\text{M}$                 | 30-40 $\mu\text{A}/\text{mM}/\text{cm}$  | 20        |
| $\text{Fe}_3\text{O}_4@\text{MF-CNTs-Lac}$ | 0.84 $\mu\text{M}$           | 1-3000 $\mu\text{M}$                  | 4.51 $\mu\text{A}/\text{mM}$             | This work |

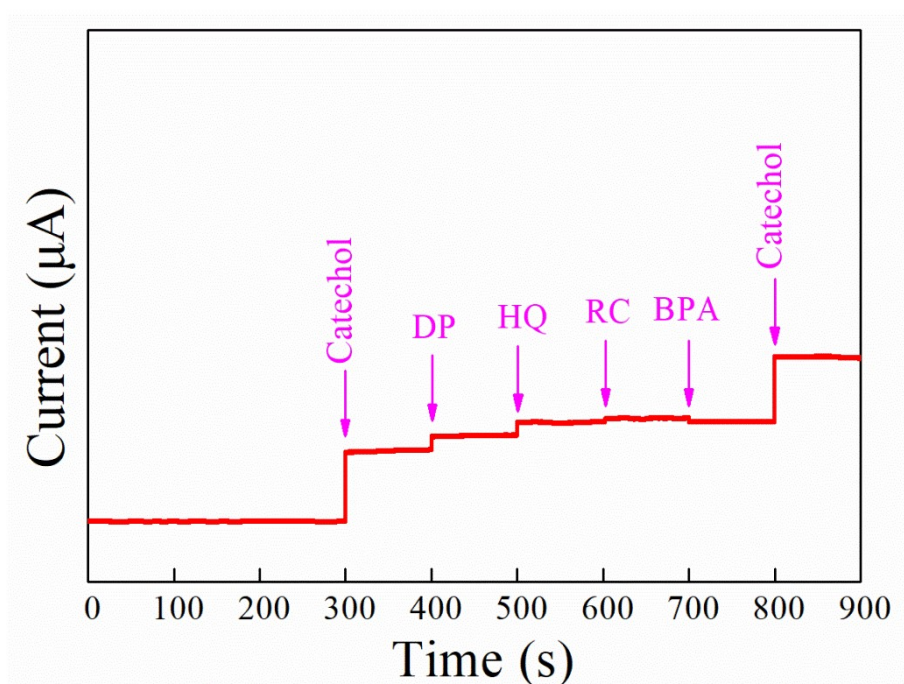

**Fig. S6.** Amperometric responses of the  $\text{Fe}_3\text{O}_4@\text{MF-CNTs-Lac}$  biosensor to successive injections of 10  $\mu\text{mol}$  catechol dopamine (DP), hydroquinone (HQ), resorcinol (RC), bisphenol A (BPA) in 50 mL acetic acid buffer (pH 4.5).

## References

- 1 Y. Liu, X. Qu, H. Guo, H. Chen, B. Liu and S. Dong, *Biosens Bioelectron*, 2006, **21**, 2195-2201.
- 2 Y. Zhang, X. Li, D. Li and Q. Wei, *Colloids Surf. B Biointerfaces*, 2020, **186**, 110683.
- 3 S. A. Deniz, S. Goker, L. Toppare and S. Soylemez, *New Journal of Chemistry*, 2022, **46**, 15521-15529.
- 4 S. Malinowski, C. Wardak, J. Jaroszyńska-Wolińska, P. A. F. Herbert and K. Pietrzak, *Journal of Water Process Engineering*, 2020, **34**.
- 5 T. Liu, Q. Zhao, Y. Xie, D. Jiang, Z. Chu and W. Jin, *Biosens Bioelectron*, 2020, **156**, 112145.
- 6 Z. Zhang, J. Liu, J. Fan, Z. Wang and L. Li, *Anal. Chim. Acta*, 2018, **1009**, 65-72.
- 7 M. Nazari, S. Kashanian, N. Maleki and N. Shahabadi, *Bulletin of Materials Science*, 2019, **42**.
- 8 S. Soylemez, S. A. Bekmezci, S. Goker and L. Toppare, *Journal of Polymer Science Part A: Polymer Chemistry*, 2019, **57**, 2333-2339.
- 9 M. C. Castrovilli, E. Tempesta, A. Carloni, P. Plescia, P. Bolognesi, J. Chiarinelli, P. Calandra, N. Cicco, M. F. Verrastro, D. Centonze, L. Gullo, A. Del Giudice, L. Galantini and L. Avaldi, *ACS Sustain Chem Eng*, 2022, **10**, 1888-1898.
- 10 Y. Zheng, D. Wang, Z. Li, X. Sun, T. Gao and G. Zhou, *Colloids and Surfaces A: Physicochemical and Engineering Aspects*, 2018, **538**, 202-209.
- 11 D. Li, L. Luo, Z. Pang, L. Ding, Q. Wang, H. Ke, F. Huang and Q. Wei, *ACS Appl. Mater. Interfaces*, 2014, **6**, 5144-5151.
- 12 L. Liu, S. Anwar, H. Ding, M. Xu, Q. Yin, Y. Xiao, X. Yang, M. Yan and H. Bi, *J. Electroanal. Chem.*, 2019, **840**, 84-92.
- 13 A. R. Puente-Santiago, D. Rodríguez-Padrón, X. Quan, M. J. Muñoz Batista, L. O. Martins, S. Verma, R. S. Varma, J. Zhou and R. Luque, *ACS Sustainable Chemistry & Engineering*, 2018, **7**, 1474-1484.
- 14 M. Romero-Arcos, M. G. Garnica-Romo and H. E. Martinez-Flores, *Materials (Basel)*, 2016, **9**.
- 15 D. Jiang, J. Pang, Q. You, T. Liu, Z. Chu and W. Jin, *Biosens. Bioelectron.*, 2019, **124-125**, 260-267.

16 Y. Zhang, Z. Lv, J. Zhou, Y. Fang, H. Wu, F. Xin, W. Zhang, J. Ma, N. Xu, A. He, W. Dong and M. Jiang, *Electroanalysis*, 2019, **32**, 142-148.

17 S. A. R. Albayati, S. Kashanian, M. Nazari and S. Rezaei, *Bulletin of Materials Science*, 2019, **42**.

18 D. Li, Y. Cheng, H. Zuo, W. Zhang, G. Pan, Y. Fu and Q. Wei, *J. Colloid Interface Sci.*, 2021, **603**, 771-782.

19 M. Yasa, A. Deniz, M. Forough, E. Yildirim, O. Persil Cetinkol, Y. A. Udum and L. Toppare, *Journal of Polymer Science*, 2020, **58**, 3336-3348.

20 R. M. Apetrei, G. Carac, G. Bahrim and P. Camurlu, *Enzyme Microb. Technol.*, 2019, **128**, 34-39.
